# Supplementary material for: A Novel Pd-P Nano-Alloy Supported on Functionalized Silica for Catalytic Aerobic Oxidation of Benzyl Alcohol
Source: MDPI journal article supplement (doi:10.3390/catal12010020), 2021-12-25
Supplement: s1 [file s1]

Supplementary Materials

# A Novel Pd-P Nano-Alloy Supported on Functionalized Silica for Catalytic Aerobic Oxidation of Benzyl Alcohol

Seyed Sepehr Moeini <sup>1,\*</sup>, Umberto Pasqual Laverdura <sup>1</sup>, Eleonora Marconi <sup>1</sup>, Nicola Lisi <sup>2</sup>, Emanuele Serra <sup>2</sup>, Rosa Chierchia <sup>2</sup>, Igor Luisetto <sup>2</sup>, Simonetta Tuti <sup>1</sup> and Daniela Tofani <sup>1</sup>

<sup>1</sup> Section of Nanoscience and Nanotechnologies, Department of Science, “Roma Tre” University, Via della Vasca Navale 79, 00146 Rome, Italy; umberto.pasquallaverdura@uniroma3.it (U.P.L.); eleonora.marconi@uniroma3.it (E.M.); simonetta.tuti@uniroma3.it (S.T.); daniela.tofani@uniroma3.it (D.T.)

<sup>2</sup> Italian National Agency for New Technologies, Energy and Sustainable Economic Development (ENEA), Via Anguillarese, 301, 00123 Rome, Italy; nicola.lisi@enea.it (N.L.); emanuele.serra@enea.it (E.S.); rosa.chierchia@enea.it (R.C.); igor.luisetto@enea.it (I.L.)

\* Correspondence: seyedsepehr.moeini@uniroma3.it

**Abstract:** Catalytic aerobic oxidation of benzyl alcohol (BnOH) to benzaldehyde (PhCHO) over supported noble metal catalysts has grabbed the attention of researchers due to the critical role of PhCHO in numerous industrial syntheses. In the present study, a novel catalyst, Pd-P alloy supported on aminopropyl-functionalized mesoporous silica (NH<sub>2</sub>-SiO<sub>2</sub>), was prepared through in situ reduction and characterized by BET-BJH analysis, SEM, TEM, XRD, FTIR, TG-DTA, and XPS. Chemical properties and catalytic performance of Pd-P/NH<sub>2</sub>-SiO<sub>2</sub> were compared with those of Pd<sup>0</sup> nanoparticles (NPs) deposited on the same support. Over Pd-P/NH<sub>2</sub>-SiO<sub>2</sub>, the BnOH conversion to PhCHO was much higher than over Pd<sup>0</sup>/NH<sub>2</sub>-SiO<sub>2</sub>, and significantly influenced by the nature of solvent, reaching 57% in toluene at 111 °C, with 63% selectivity. Using pure oxygen as an oxidant in the same conditions, the BnOH conversion increased up to 78%, with 66% selectivity. The role of phosphorous in improving the activity may consist of the strong interaction with Pd that favours metal dispersion and lowers Pd electron density.

**Keywords:** benzyl alcohol; functionalized silica; palladium nanoparticles; palladium-phosphorous alloy; aerobic oxidation; benzaldehyde; selectivity

**Citation:** Moeini, S.S.; Pasqual Laverdura, U.; Marconi, E.; Lisi, N.; Serra, E.; Chierchia, R.; Luisetto, I.; Tuti, S.; Tofani, D. A Novel Pd-P Nano-Alloy Supported on Functionalized Silica for Catalytic Aerobic Oxidation of Benzyl Alcohol. *Catalysts* **2022**, *12*, 20. <https://doi.org/10.3390/catal12010020>

Academic Editor: Werner Oberhauser

Received: 24 November 2021

Accepted: 22 December 2021

Published: 25 December 2021

**Publisher’s Note:** MDPI stays neutral with regard to jurisdictional claims in published maps and institutional affiliations.

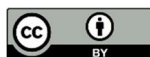

**Copyright:** © 2021 by the authors. Licensee MDPI, Basel, Switzerland. This article is an open access article distributed under the terms and conditions of the Creative Commons Attribution (CC BY) license (<https://creativecommons.org/licenses/by/4.0/>).

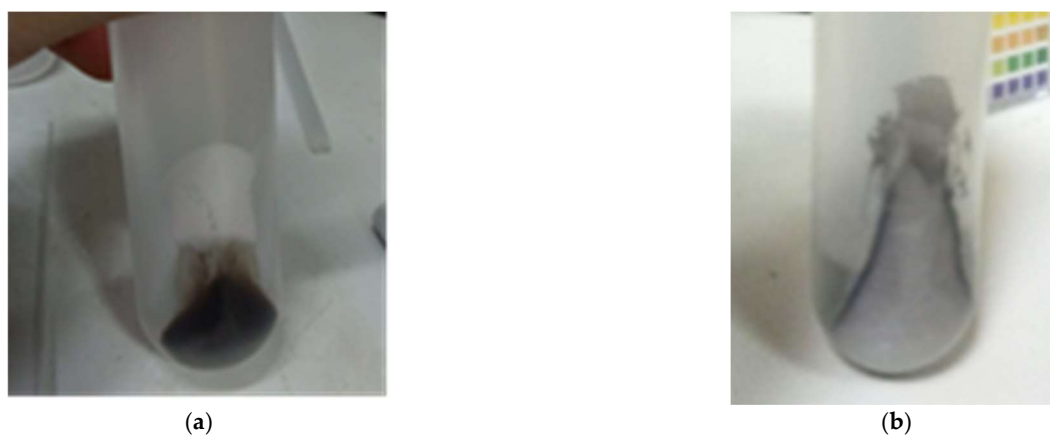

**Figure S1.** Materials produced by loading (a) Pd<sup>0</sup>, (b) Pd-P alloy particles on pristine silica support.

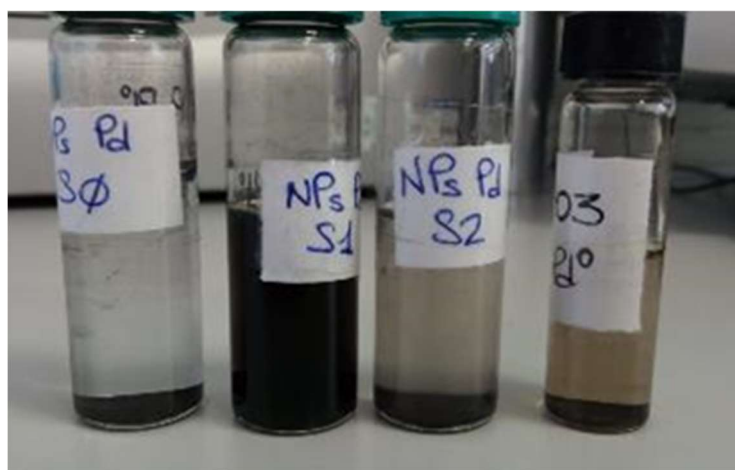

**Figure S2.** Products of palladium nanoparticles syntheses, varying the Oam/TOP ratio and the reaction time.

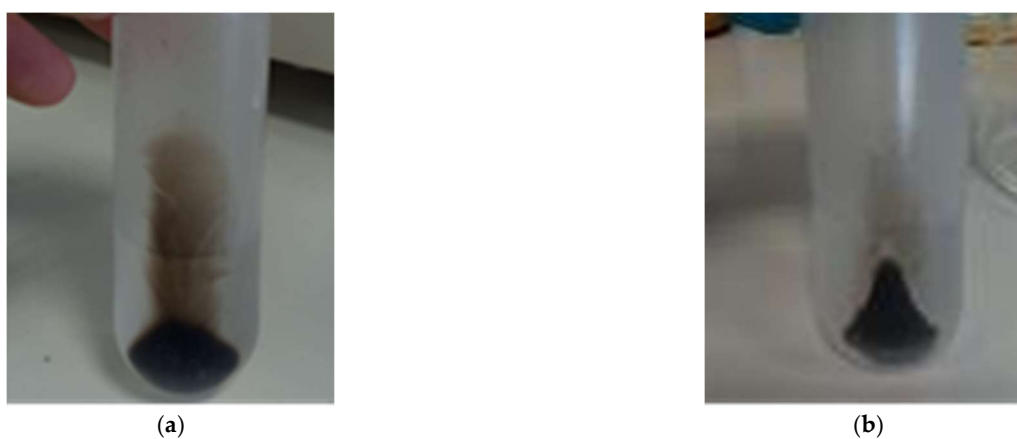

**Figure S3.** (a) Pd<sup>0</sup>/NH<sub>2</sub>-SiO<sub>2</sub>, (b) Pd-P/NH<sub>2</sub>-SiO<sub>2</sub> before final drying.

**Table S1.** Effect of 3-APTES concentration on surface area of SiO<sub>2</sub> nanoparticles. (T=110 °C, time of reflux 48 h).

| Scheme 2. APTES. | BET S.A. m <sup>2</sup> g <sup>-1</sup> |
|------------------|-----------------------------------------|
| no APTES         | 564                                     |
| 3,10             | 173                                     |
| 1,55             | 88                                      |

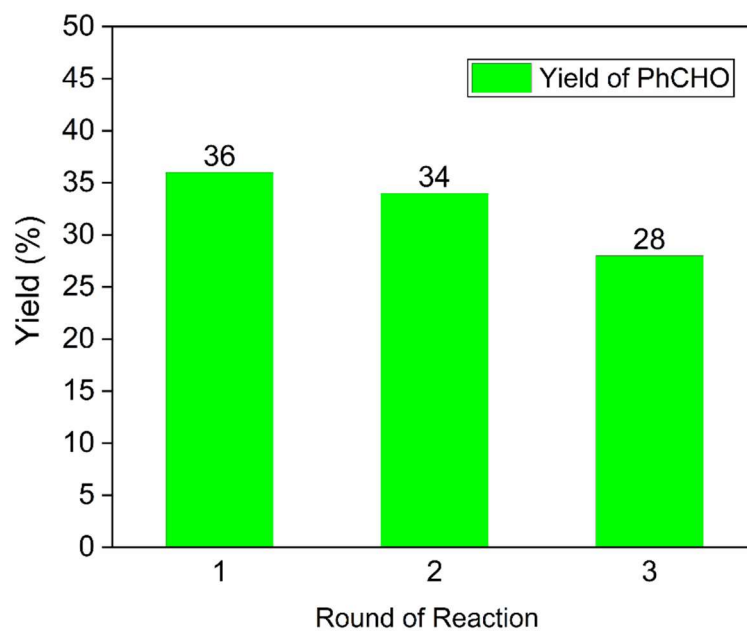**Figure S4.** Recyclability of Pd-P/NH<sub>2</sub>-SiO<sub>2</sub> in terms of PhCHO yield. Reaction was performed using 10 mL BnOH 0.1 M solution in toluene, 53 mg catalyst, and 20 mL min<sup>-1</sup> air flow at 111 °C for 5 h. After each round of the reaction, the catalyst was recovered by centrifugation and washing with cyclohexane three times, following by drying in room temperature over the night.**Table S2.** Details of calculation of TOF and TOF<sub>bulk</sub> of Pd-P/NH<sub>2</sub>-SiO<sub>2</sub>.

| Entry | T (°C) | Oxidant<br>(20 ml min <sup>-1</sup> ) | TOF (h <sup>-1</sup> ) <sup>a</sup> | t (min) <sup>b</sup> | X (%) <sup>c</sup> | TOF <sub>bulk</sub><br><sub>k</sub> (h <sup>-1</sup> ) <sup>d</sup> | X <sub>1h</sub> (%) <sup>e</sup> |
|-------|--------|---------------------------------------|-------------------------------------|----------------------|--------------------|---------------------------------------------------------------------|----------------------------------|
| 1     | 50     | Air                                   | 55                                  | 300                  | 11                 | 29                                                                  | 4                                |
| 2     | 80     | Air                                   | 255                                 | 60                   | 10                 | 90                                                                  | 10                               |
| 3     | 111    | Air                                   | 4999                                | 5                    | 16                 | 1134                                                                | 37                               |
| 4     | 111    | O <sub>2</sub>                        | 5982                                | 5                    | 19                 | 1431                                                                | 57                               |

a Calculated using "equation 10" for the conversions (X) of at least 10 %, considering Pd dispersion (D) = 32 % (based on TEM analysis) and Pd content = 0.91 ± 0.23 %w/w (by SEM-EDS)

b Time at which the TOF is calculated (values converted to "hour" before being used in the equation 10)

c Conversion at the time "t"

d Calculated using "equation 11" for t = 1 h

e Conversion at 1 h, used for the calculation of TOF<sub>bulk</sub>

Reaction Conditions: 10 mL BnOH 0.1M solution in toluene, 53 mg Pd-P/NH<sub>2</sub>-SiO<sub>2</sub>.
